# Supplementary material
Source: publisher figshare collection journal article supplement (https://sage.figshare.com/ndownloader/files/15301061)
Supplement: Supplementary file 1 [file 15301061]

**Appendix 1**

**Included References (ordered by publication date, n=394)**

1. Davison, B.J., et al., *Using a web-based decision support intervention to facilitate patient-physician communication at prostate cancer treatment discussions.*

2. Romero, S.C. and F.M. Doren, *Toma de decisiones en mujeres que acuden al control sano de un programa infantil Health decision making in women’s that attends to well baby care.* Volumen 15: p. 53.

3. Yeakle, J. and R. Allen, *Piloting EDMAC: The End-of-Life Decision Making and Memory Complaint Project.*

4. O'Connor, A.M., *Validation of a decisional conflict scale.* Medical Decision Making, 1995. **15**(1): p. 25-30.

5. O'Connor, A.M. and D.J. Perrault, *Importance of physician's role highlighted in survey of women's breast screening practices.* Canadian Journal of Public Health. Revue Canadienne de Sante Publique, 1995. **86**(1): p. 42-5.

6. Bunn, H. and A. O'Connor, *Validation of client decision-making instruments in the context of psychiatry.* Canadian Journal of Nursing Research, 1996. **28**(3): p. 13-27.

7. Holmes-Rovner, M., et al., *Patient satisfaction with health care decisions: The Satisfaction with Decision scale.* Medical Decision Making, 1996. **16**(1): p. 58-64.

8. O'Connor, A.M., R.A. Pennie, and R.E. Dales, *Framing effects on expectations, decisions, and side effects experienced: the case of influenza immunization.[Erratum appears in J Clin Epidemiol 1997 Jun;50(6):747-8].* Journal of Clinical Epidemiology, 1996. **49**(11): p. 1271-6.

9. Bunn, M.H., et al., *Characteristics of clients with schizophrenia who express certainty or uncertainty about continuing treatment with depot neuroleptic medication.* Archives of Psychiatric Nursing, 1997. **11**(5): p. 238-248.

10. Rothert, M.L., et al., *An educational intervention as decision support for menopausal women.* Research in Nursing & Health, 1997. **20**(5): p. 377-387.

11. Bernstein, S.J., et al., *A randomized controlled trial of information-giving to patients referred for coronary angiography: effects on outcomes of care.* Health Expectations, 1998. **1**: p. 50–61.

12. O'Connor, A.M., et al., *A decision aid for women considering hormone therapy after menopause: decision support framework and evaluation.* Patient Education and Counseling, 1998. **33**: p. 267–279.

13. O'Connor, A.M., et al., *Randomized trial of a portable, self-administered decision aid for postmenopausal women considering long-term preventive hormone therapy.* Medical Decision Making, 1998. **18**(3): p. 295-303.

14. Sawka, C.A., et al., *Development of a patient decision aid for choice of surgical treatment for breast cancer.* Health Expectations, 1998. **1**: p. 23–36.

15. *Information and patient participation in screening for prostate cancer*. 1999, Elsevier Science: Netherlands. p. 255-263.

16. Drake, E.R., et al., *Development and evaluation of a decision aid about prenatal testing for women of advanced maternal age.* Journal of Genetic Counseling, 1999. **8**(4): p. 217-233.

17. Man-Son-Hing, M., et al., *A patient decision aid regarding antithrombotic therapy for stroke prevention in atrial fibrillation: a randomized controlled trial.* JAMA, 1999. **282**(8): p. 737-43.

18. O'Connor, A.M., et al., *The effects of anexplicit'values clarification exercise in a woman's decision aid regarding postmenopausal hormone therapy.* Health Expectations, 1999. **2**: p. 21–32.

19. Brundage, M.D., et al., *A treatment trade-off based decision aid for patients with locally advanced non-small cell lung cancer.* Health Expectations, 2000. **3**(1): p. 55-68.

20. Connelly, M.T., et al., *Patient knowledge about hormone replacement therapy: implications for treatment.* Menopause, 2000. **7**: p. 266–272.

21. Fiset, V., et al., *Development and evaluation of a decision aid for patients with stage IV non-small cell lung cancer.* Health Expectations, 2000. **3**: p. 125–136.

22. Elit, L., et al., *Quality of life and psychosexual adjustment after prophylactic oophorectomy for a family history of ovarian cancer.* Familial Cancer, 2001. **1**(3-4): p. 149-56.

23. Goel, V., et al., *Randomized trial of a patient decision aid for choice of surgical treatment for breast cancer.* Medical Decision Making, 2001. **21**(1): p. 1-6.

24. Grant, F.C., et al., *Evaluation of a decision aid for patients considering autologous blood donation before open-heart surgery.* CMAJ Canadian Medical Association Journal, 2001. **164**(8): p. 1139-44.

25. Koedoot, N., et al., *The decisional conflict scale: Further validation in two samples of Dutch oncology patients.* Patient Education and Counseling, 2001. **45**(3): p. 187-193.

26. Mitchell, S.L., J. Tetroe, and A.M. O'Connor, *A decision aid for long-term tube feeding in cognitively impaired older persons.* Journal of the American Geriatrics Society, 2001. **49**(3): p. 313-316.

27. Molenaar, S., et al., *Decision support for patients with early-stage breast cancer: Effects of an interactive breast cancer CDROM on treatment decision, satisfaction, and quality of life.* Journal of Clinical Oncology, 2001. **19**(6): p. 1676-1687.

28. Murray, E., et al., *Randomised controlled trial of an interactive multimedia decision aid on hormone replacement therapy in primary care*. 2001, BMJ Publishing Group: United Kingdom. p. 490.

29. Murray, E., et al., *Randomised controlled trial of an interactive multimedia decision aid on benign prostatic hypertrophy in primary care*. 2001, BMJ Publishing Group: United Kingdom. p. 493.

30. Ross, M.M., et al., *Seniors' decision making about pain management.* Journal of Advanced Nursing, 2001. **35**(3): p. 442-51.

31. *The multi-dimensional measure of informed choice: A validation study*. 2002, Elsevier Science: Netherlands. p. 87-91.

32. *Randomized controlled trial of a patient decision aid for colorectal cancer screening*. 2002, Sage Publications: US. p. 125-139.

33. Cranney, A., et al., *Development and pilot testing of a decision aid for postmenopausal women with osteoporosis.* Patient Education and Counseling, 2002. **47**(3): p. 245-255.

34. Kaiser, A.S., et al., *The effects of prenatal group genetic counselling on knowledge, anxiety and decisional conflict: issues for nuchal translucency screening.* Journal of Obstetrics & Gynaecology, 2002. **22**(3): p. 246-55.

35. Bekker, H.L., J. Hewison, and J.G. Thornton, *Understanding why decision aids work: Linking process with outcome.* Patient Education and Counseling, 2003. **50**(3): p. 323-329.

36. Brehaut, J.C., et al., *Validation of a Decision Regret Scale.* Medical Decision Making, 2003. **23**(4): p. 281-292.

37. Clark, H.D., et al., *What factors are associated with a woman's decision to take hormone replacement therapy? Evaluated in the context of a decision aid.* Health Expectations, 2003. **6**: p. 110–117.

38. Gattellari, M. and J.E. Ward, *Does evidence-based information about screening for prostate cancer enhance consumer decision-making? A randomised controlled trial.[Erratum appears in J Med Screen. 2004;11(4):211].* Journal of Medical Screening, 2003. **10**(1): p. 27-39.

39. Guimond, P., et al., *Validation of a tool to assess health practitioners' decision support and communication skills.* Patient Education and Counseling, 2003. **50**(3): p. 235-245.

40. Humphreys, L., et al., *What is the significance of attendance by the partner at genetic counselling for advanced maternal age?* Psychology, Health & Medicine, 2003. **8**(3): p. 266-278.

41. Légaré, F., et al., *The effects of decision aids on the agreement between women's and physicians' decisional conflict about hormone replacement therapy.* Patient Education and Counseling, 2003. **50**(2): p. 211-221.

42. Montgomery, A.A., T. Fahey, and T.J. Peters, *A factorial randomised controlled trial of decision analysis and an information video plus leaflet for newly diagnosed hypertensive patients.* British Journal of General Practice, 2003. **53**(491): p. 446-53.

43. Montori, V.M., et al., *Decisional attributes of patients with diabetes - The aspirn choice.* Diabetes Care, 2003. **26**(10): p. 2804-2809.

44. Murray, M.A., et al., *Women's Decision-Making Needs Regarding Place of Care at End of Life.* Journal of Palliative Care, 2003. **19**(3): p. 176-184.

45. Stacey, D., et al., *Development and evaluation of a breast cancer prevention decision aid for higher-risk women.* Health Expectations, 2003. **6**(1): p. 3-18.

46. Weinfurt, K.P., et al., *The correlation between patient characteristics and expectations of benefit from Phase I clinical trials.* Cancer, 2003. **98**(1): p. 166-175.

47. Whelan, T., et al., *Helping patients make informed choices: A randomized trial of a decision aid for adjuvant chemotherapy in lymph node-negative breast cancer.* Journal of the National Cancer Institute, 2003. **95**(8): p. 581-587.

48. Wills, C.E. and M. Holmes-Rovner, *Preliminary validation of the Satisfaction With Decision scale with depressed primary care patients.* Health Expectations: An International Journal of Public Participation in Health Care & Health Policy, 2003. **6**(2): p. 149-159.

49. Bekker, H.L., J. Hewison, and J.G. Thornton, *Applying decision analysis to facilitate informed decision making about prenatal diagnosis for Down syndrome: a randomised controlled trial.* Prenatal Diagnosis, 2004. **24**(4): p. 265-75.

50. Briggs, L.A., et al., *Patient-centered advance care planning in special patient populations: a pilot study.* Journal of Professional Nursing, 2004. **20**(1): p. 47-58.

51. Brown, R.F., et al., *Education and role modelling for clinical decisions with female cancer patients.* Health Expectations: An International Journal of Public Participation in Health Care & Health Policy, 2004. **7**(4): p. 303-316.

52. Burusanont, M. and R.S. Hadsall, *Factors associated with intention to use hormone replacement therapy among Thai middle-aged women.* Maturitas, 2004. **47**(3): p. 219-227.

53. Deschamps, M.A., et al., *Impact of pharmacist consultation versus a decision aid on decision making regarding hormone replacement therapy.* International Journal of Pharmacy Practice, 2004. **12**(1): p. 21-28.

54. Feldman-Stewart, D., et al., *Patient-focussed decision-making in early-stage prostate cancer: Insights from a cognitively based decision aid.* Health Expectations: An International Journal of Public Participation in Health Care & Health Policy, 2004. **7**(2): p. 126-141.

55. Gattellari, M. and J.E. Ward, *Does a deadline improve men's participation in self-administered health surveys? A randomized controlled trial in general practice.* Journal of Public Health, 2004. **26**(4): p. 384-7.

56. Green, M.J., et al., *Effect of a Computer-Based Decision Aid on Knowledge, Perceptions, and Intentions About Genetic Testing for Breast Cancer Susceptibility: A Randomized Controlled Trial.* JAMA: Journal of the American Medical Association, 2004. **292**(4): p. 442-452.

57. Kaiser, A.S., et al., *Psychological responses to prenatal NTS counseling and the uptake of invasive testing in women of advanced maternal age.* Patient Education and Counseling, 2004. **54**(1): p. 45-53.

58. Lalonde, L., et al., *Development and preliminary testing of a patient decision aid to assist pharmaceutical care in the prevention of cardiovascular disease.* Pharmacotherapy:The Journal of Human Pharmacology & Drug Therapy, 2004. **24**(7): p. 909-22.

59. Mayo, A.M. and S. Cobler, *Flu vaccines and patient decision making: what we need to know.* Journal of the American Academy of Nurse Practitioners, 2004. **16**(9): p. 402-10.

60. Molenaar, S., et al., *Predictors of patients' choices for breast-conserving therapy or mastectomy: a prospective study.* British Journal of Cancer, 2004. **90**(11): p. 2123-30.

61. Steginga, S.K. and S. Occhipinti, *The Application of the Heuristic-Systematic Processing Model to Treatment Decision Making about Prostate Cancer.* Medical Decision Making, 2004. **24**(6): p. 573-583.

62. Steginga, S.K., et al., *A prospective study of the use of alternative therapies by men with localized prostate cancer.* Patient Education and Counseling, 2004. **55**(1): p. 70-77.

63. Steginga, S.K., et al., *Prospective study of men's psychological and decision-related adjustment after treatment for localized prostate cancer.* Urology, 2004. **63**(4): p. 751-6.

64. Tait, A.R., T. Voepel-Lewis, and S. Malviya, *Factors that influence parents' assessments of the risks and benefits of research involving their children.* Pediatrics, 2004. **113**(4): p. 727-732.

65. van Roosmalen, M.S., et al., *Randomised trial of a decision aid and its timing for women being tested for a BRCA1/2 mutation.* British Journal of Cancer, 2004. **90**(2): p. 333-342.

66. van Roosmalen, M.S., et al., *Randomized trial of a shared decision-making intervention consisting of trade-offs and individualized treatment information for BRCA1/2 mutation carriers.* Journal of Clinical Oncology, 2004. **22**(16): p. 3293-3301.

67. van Roosmalen, M.S., et al., *Impact of BRCA1/2 testing and disclosure of a positive test result on women affected and unaffected with breast or ovarian cancer.* American Journal of Medical Genetics Part A, 2004. **124A**(4): p. 346-355.

68. Whelan, T., et al., *Effect of a Decision Aid on Knowledge and Treatment Decision Making for Breast Cancer Surgery: A Randomized Trial.* JAMA: Journal of the American Medical Association, 2004. **292**(4): p. 435-441.

69. Davey, C., et al., *Reconciling population benefits and women's individual autonomy in mammographic screening: in-depth interviews to explore women's views about 'informed choice'.* Australian and New Zealand Journal of Public Health, 2005. **29**(1): p. 69-77.

70. Gattellari, M., et al., *Does 'peer coaching' increase GP capacity to promote informed decision making about PSA screening? A cluster randomised trial.* Family Practice, 2005. **22**(3): p. 253-265.

71. Gattellari, M. and J.E. Ward, *A community-based randomised controlled trial of three different educational resources for men about prostate cancer screening.* Patient Education and Counseling, 2005. **57**(2): p. 162-182.

72. Hunter, A.G.W., et al., *A randomized trial comparing alternative approaches to prenatal diagnosis counseling in advanced maternal age patients.* Clinical Genetics, 2005. **67**(4): p. 303-13.

73. McAlister, F.A., et al., *Impact of a patient decision aid on care among patients with nonvalvular atrial fibrillation: a cluster randomized trial.* CMAJ, 2005. **173**(5): p. 496-501.

74. Penticuff, J.H. and K.L. Arheart, *Effectiveness of an Intervention to Improve Parent-Professional Collaboration in Neonatal Intensive Care.* The Journal of Perinatal & Neonatal Nursing, 2005. **19**(2): p. 187-202.

75. Shorten, A., et al., *Making choices for childbirth: A randomized controlled trial of a decision-aid for informed birth after cesarean.* Birth: Issues in Perinatal Care, 2005. **32**(4): p. 252-261.

76. Song, M.-K., et al., *A Randomized, Controlled Trial to Improve Advance Care Planning Among Patients Undergoing Cardiac Surgery.* Medical Care, 2005. **43**(10): p. 1049-1053.

77. van den Berg, M., et al., *Are pregnant women making informed choices about prenatal screening?* Genetics in Medicine, 2005. **7**(5): p. 332-8.

78. Wilson, K.G., et al., *Evaluation of a decision aid for making choices about intubation and mechanical ventilation in chronic obstructive pulmonary disease.* Patient Education and Counseling, 2005. **57**(1): p. 88-95.

79. *Dispositional optimism as a predictor of men's decision-related distress after localized prostate cancer*. 2006, American Psychological Association: US. p. 135-143.

80. Arimori, N., *Randomized controlled trial of decision aids for women considering prenatal testing: The effect of the Ottawa Personal Decision Guide on decisional conflict.* Japan Journal of Nursing Science, 2006. **3**(2): p. 119-130.

81. Baldé, A., F. Légaré, and M. Labrecque, *Assessment of needs of men for decision support on male sterilization.* Patient Education and Counseling, 2006. **63**(3): p. 301-307.

82. Berry, D.L., et al., *Factors that predict treatment choice and satisfaction with the decision in men with localized prostate cancer.* Clinical Genitourinary Cancer, 2006. **5**(3): p. 219-26.

83. Bieber, C., et al., *Long-term effects of a shared decision-making intervention on physician-patient interaction and outcome in fibromyalgia: a qualitative and quantitative 1 year follow-up of a randomized controlled trial.* Patient Education & Counseling, 2006. **63**(3): p. 357-366.

84. Bunn, H., et al., *Health preferences and decision-making needs of disadvantaged women.* Journal of Advanced Nursing, 2006. **56**(3): p. 247-260.

85. Edwards, A., et al., *Presenting risk information to people with diabetes: Evaluating effects and preferences for different formats by a web-based randomised controlled trial.* Patient Education and Counseling, 2006. **63**(3): p. 336-349.

86. Feldman-Stewart, D., et al., *An explicit values clarification task: Development and validation.* Patient Education and Counseling, 2006. **63**(3): p. 350-356.

87. Hochlehnert, A., et al., *A computer-based information-tool for chronic pain patients: Computerized information to support the process of shared decision-making.* Patient Education and Counseling, 2006. **61**(1): p. 92-98.

88. Jibaja-Weiss, M.L., et al., *Preliminary testing of a just-in-time, user-defined values clarification exercise to aid lower literate women in making informed breast cancer treatment decisions.* Health Expectations: An International Journal of Public Participation in Health Care & Health Policy, 2006. **9**(3): p. 218-231.

89. Lalonde, L., et al., *Evaluation of a decision aid and a personal risk profile in community pharmacy for patients considering options to improve cardiovascular health: the OPTIONS pilot study.* International Journal of Pharmacy Practice, 2006. **14**: p. 51–62.

90. Laupacis, A., et al., *A decision aid for autologous pre-donation in cardiac surgery--A randomized trial.* Patient Education and Counseling, 2006. **61**(3): p. 458-466.

91. Legare, F., et al., *Impact of the Ottawa Decision Support Framework on the Agreement and the Difference between Patients' and Physicians' Decisional Conflict.* Medical Decision Making, 2006. **26**(4): p. 373-390.

92. Mancini, J., et al., *Impact of an information booklet on satisfaction and decision-making about BRCA genetic testing.* European Journal of Cancer, 2006. **42**(7): p. 871-881.

93. Mancini, J., et al., *Cross-cultural validation of the Decisional Conflict Scale in a sample of French patients.* Quality of Life Research: An International Journal of Quality of Life Aspects of Treatment, Care & Rehabilitation, 2006. **15**(6): p. 1063-1068.

94. Matloff, E.T., et al., *Healthy women with a family history of breast cancer: Impact of a tailored genetic counseling intervention on risk perception, knowledge, and menopausal therapy decision making.* Journal of Womens Health, 2006. **15**(7): p. 843-856.

95. Peterson, S.K., et al., *Evaluation of a decision aid for families considering p53 genetic counseling and testing.* Genetics in Medicine, 2006. **8**(4): p. 226-33.

96. Song, M.-K. and S.M. Sereika, *An evaluation of the Decisional Conflict Scale for measuring the quality of end-of-life decision making.* Patient Education and Counseling, 2006. **61**(3): p. 397-404.

97. Taylor, K.L., et al., *Educating African American men about the prostate cancer screening dilemma: a randomized intervention.* Cancer Epidemiology, Biomarkers & Prevention, 2006. **15**(11): p. 2179-88.

98. Tiller, K., et al., *Randomized Controlled Trial of a Decision Aid for Women at Increased Risk of Ovarian Cancer.* Medical Decision Making, 2006. **26**(4): p. 360-372.

99. Wong, S.S.M., et al., *A randomised controlled trial of a decision-aid leaflet to facilitate women's choice between pregnancy termination methods.* BJOG: An International Journal of Obstetrics & Gynaecology, 2006. **113**(6): p. 688-94.

100. Akl, E.A., et al., *A decision aid for COPD patients considering inhaled steroid therapy: development and before and after pilot testing.* BMC Medical Informatics & Decision Making, 2007. **7**: p. 12.

101. Brown, R.F., et al., *Seeking informed consent to cancer clinical trials; evaluating the efficacy of doctor communication skills training.* Psycho-Oncology, 2007. **16**(6): p. 507-516.

102. Campos R, S. and J.C. Pérez E, *Autoeficacia Y Conflicto Decisional Frente a La DisminuciÓn Delpeso Corporal En Mujeres Weight in Women.* Revista chilena de nutrición, 2007. **34**(3): p. 213-218.

103. Choy, E.T., et al., *A pilot study to evaluate the impact of involving breast cancer patients in the multidisciplinary discussion of their disease and treatment plan.* Breast, 2007. **16**(2): p. 178-189.

104. Col, N.F., et al., *Can computerized decision support help patients make complex treatment decisions? A randomized controlled trial of an individualized menopause decision aid.* Medical Decision Making, 2007. **27**(5): p. 585-598.

105. Davison, B.J., et al., *Comparing a generic and individualized information decision support intervention for men newly diagnosed with localized prostate cancer.* Cancer nursing, 2007. **30**: p. E7–E15.

106. Feldman-Stewart, D., S. Brennenstuhl, and M.D. Brundage, *A purpose-based evaluation of information for patients: An approach to measuring effectiveness.* Patient Education and Counseling, 2007. **65**(3): p. 311-319.

107. Kopec, J.A., et al., *Probabilistic threshold technique showed that patients' preferences for specific trade-offs between pain relief and each side effect of treatment in osteoarthritis varied.* Journal of Clinical Epidemiology, 2007. **60**(9): p. 929-38.

108. Kremer, H., et al., *"It's my body": Does patient involvement in decision making reduce decisional conflict?* Medical Decision Making, 2007. **27**(5): p. 522-532.

109. Krist, A.H., S.H. Woolf, and R.E. Johnson, *How physicians approach prostate cancer screening before and after losing a lawsuit.* Annals of Family Medicine, 2007. **5**(2): p. 120-5.

110. Krist, A.H., et al., *Patient education on prostate cancer screening and involvement in decision making.* Annals of Family Medicine, 2007. **5**(2): p. 112-119.

111. Mathieu, E., et al., *Informed choice in mammography screening: a randomized trial of a decision aid for 70-year-old women.* Archives of Internal Medicine, 2007. **167**(19): p. 2039-46.

112. McCullum, M., et al., *Time to decide about risk-reducing mastectomy: A case series of BRCA1/2 gene mutation carriers.* BMC women's health, 2007. **7**: p. 3.

113. Metcalfe, K.A., et al., *Development and testing of a decision aid for breast cancer prevention for women with a BRCA1 or BRCA2 mutation.* Clinical Genetics, 2007. **72**(3): p. 208-17.

114. Molenaar, S., et al., *Exploring the black box of a decision aid: What information do patients select from an interactive Cd-Rom on treatment options in breast cancer?* Patient Education and Counseling, 2007. **65**(1): p. 122-130.

115. Montgomery, A.A., et al., *Two decision aids for mode of delivery among women with previous caesarean section: randomised controlled trial.* BMJ, 2007. **334**(7607): p. 1305.

116. Nassar, N., et al., *Development and pilot-testing of a decision aid for women with a breech-presenting baby.* Midwifery, 2007. **23**(1): p. 38-47.

117. Nassar, N., et al., *Evaluation of a decision aid for women with breech presentation at term: a randomised controlled trial [ISRCTN14570598].* BJOG: An International Journal of Obstetrics & Gynaecology, 2007. **114**(3): p. 325-33.

118. Ozanne, E.M., et al., *Pilot trial of a computerized decision aid for breast cancer prevention.* Breast Journal, 2007. **13**(2): p. 147-54.

119. Protheroe, J., P. Bower, and C. Chew-Graham, *The use of mixed methodology in evaluating complex interventions: Identifying patient factors that moderate the effects of a decision aid.* Family Practice, 2007. **24**(6): p. 594-600.

120. Protheroe, J., et al., *Effectiveness of a computerized decision aid in primary care on decision making and quality of life in menorrhagia: Results of the MENTIP randomized controlled trial.* Medical Decision Making, 2007. **27**(5): p. 575-584.

121. Saver, B.G., et al., *A tale of two studies: The importance of setting, subjects and context in two randomized, controlled trials of a web-based decision support for perimenopausal and postmenopausal health decisions.* Patient Education and Counseling, 2007. **66**(2): p. 211-222.

122. Schapira, M.M., et al., *Decision-making at menopause: A randomized controlled trial of a computer-based hormone therapy decision-aid.* Patient Education and Counseling, 2007. **67**(1-2): p. 100-107.

123. Sepucha, K., et al., *An approach to measuring the quality of breast cancer decisions.* Patient Education and Counseling, 2007. **65**(2): p. 261-269.

124. Tercyak, K.P., et al., *Information needs of mothers regarding communicating BRCA1/2 cancer genetic test results to their children.* Genetic Testing, 2007. **11**(3): p. 249-55.

125. Thomson, R.G., et al., *A patient decision aid to support shared decision-making on anti-thrombotic treatment of patients with atrial fibrillation: randomised controlled trial.* Quality & Safety in Health Care, 2007. **16**(3): p. 216-223.

126. Weng, H.H., et al., *Development of a decision aid to address racial disparities in utilization of knee replacement surgery.* Arthritis & Rheumatism-Arthritis Care & Research, 2007. **57**(4): p. 568-575.

127. Weymiller, A.J., et al., *Helping patients with type 2 diabetes mellitus make treatment decisions: statin choice randomized trial.* Archives of Internal Medicine, 2007. **167**(10): p. 1076-82.

128. Arino Lambea, P., et al., *[Patients' perception of certainty about decisions to undergo surgery and the relationship between certainty and prior information received].* Revista Espanola de Anestesiologia y Reanimacion, 2008. **55**(8): p. 468-74.

129. Belkora, J.K., et al., *Monitoring the implementation of consultation planning, recording, and summarizing in a breast care center.* Patient Education and Counseling, 2008. **73**(3): p. 536-543.

130. Bieber, C., et al., *A shared decision-making communication training program for physicians treating fibromyalgia patients: Effects of a randomized controlled trial.* Journal of Psychosomatic Research, 2008. **64**(1): p. 13-20.

131. Cousineau, T.M., et al., *Online psychoeducational support for infertile women: a randomized controlled trial.* Human Reproduction, 2008. **23**(3): p. 554-66.

132. Dobke, M.K., et al., *Pilot trial of telemedicine as a decision aid for patients with chronic wounds.* Telemedicine Journal & E-Health, 2008. **14**(3): p. 245-9.

133. Farnworth, A., et al., *Decision support for women choosing mode of delivery after a previous caesarean section: A developmental study.* Patient Education and Counseling, 2008. **71**(1): p. 116-124.

134. Flynn, K.E., et al., *Decisional conflict among patients who accept or decline participation in phase I oncology studies.* Journal of Empirical Research on Human Research Ethics, 2008. **3**(3): p. 69-77.

135. Frosch, D.L., et al., *Internet patient decision support - A Randomized controlled trial comparing alternative approaches for men considering prostate cancer screening.* Archives of Internal Medicine, 2008. **168**(4): p. 363-369.

136. Griffith, J.M., et al., *The effect of offering different numbers of colorectal cancer screening test options in a decision aid: a pilot randomized trial.* Bmc Medical Informatics and Decision Making, 2008. **8**.

137. Ilic, D., et al., *Informing men about prostate cancer screening: A randomized controlled trial of patient education materials.* Journal of General Internal Medicine, 2008. **23**(4): p. 466-471.

138. Kerns, J.W., et al., *Patient perceptions of how physicians communicate during prostate cancer screening discussions: a comparison of residents and faculty.* Family Medicine, 2008. **40**(3): p. 181-7.

139. Legare, F., et al., *Patient decision aid on natural health products for menopausal symptoms: randomized controlled trial.* Menopause International, 2008. **14**(3): p. 105-10.

140. McCaffery, K.J., et al., *HPV testing versus repeat pap testing for the management of a minor abnormal pap smear: Evaluation of a decision aid to support informed choice.* Patient Education and Counseling, 2008. **73**(3): p. 473-481.

141. Nagle, C., et al., *Use of a decision aid for prenatal testing of fetal abnormalities to improve women's informed decision making: a cluster randomised controlled trial [ISRCTN22532458].* BJOG: An International Journal of Obstetrics & Gynaecology, 2008. **115**(3): p. 339-47.

142. Peterson, S.K., et al., *Psychological functioning in persons considering genetic counseling and testing for Li-Fraumeni syndrome.* Psycho-Oncology, 2008. **17**(8): p. 783-789.

143. Prunty, M.C., et al., *The motherhood choice: A decision aid for women with multiple sclerosis.* Patient Education and Counseling, 2008. **71**(1): p. 108-115.

144. Rahangdale, L., et al., *Patient acceptance of and satisfaction with rapid HIV testing in a labor and delivery setting.* Journal of Women's Health, 2008. **17**(3): p. 465-471.

145. Sprague, A.E., et al., *Bed rest and activity restriction for women at risk for preterm birth: a survey of Canadian prenatal care providers.* Journal of Obstetrics & Gynaecology Canada: JOGC, 2008. **30**(4): p. 317-26.

146. Stacey, D., et al., *Decision-making needs of patients with depression: A descriptive study.* Journal of Psychiatric and Mental Health Nursing, 2008. **15**(4): p. 287-295.

147. Steginga, S.K., et al., *Early decision and psychosocial support intervention for men with localised prostate cancer: an integrated approach.* Supportive Care in Cancer, 2008. **16**(7): p. 821-9.

148. Stephens, R.L., et al., *Influence of a patient decision aid on decisional conflict related to PSA testing: A structural equation model.* Health Psychology, 2008. **27**(6): p. 711-721.

149. Sullivan, S.M., et al., *Influenza vaccination and decisional conflict among regulated and unregulated direct nursing care providers in long-term-care homes.* AAOHN Journal, 2008. **56**(2): p. 77-84.

150. Trevena, L.J., L. Irwig, and A. Barratt, *Randomized trial of a self-administered decision aid for colorectal cancer screening.* Journal of Medical Screening, 2008. **15**(2): p. 76-82.

151. Volk, R.J., et al., *Entertainment education for prostate cancer screening: A randomized trial among primary care patients with low health literacy.* Patient Education and Counseling, 2008. **73**(3): p. 482-489.

152. Wakefield, C.E., et al., *A randomized controlled trial of a decision aid for women considering genetic testing for breast and ovarian cancer risk.* Breast Cancer Research and Treatment, 2008. **107**(2): p. 289-301.

153. Wakefield, C.E., et al., *A randomized trial of a breast/ovarian cancer genetic testing decision aid used as a communication aid during genetic counseling.* Psycho-Oncology, 2008. **17**(8): p. 844-854.

154. Wakefield, C.E., et al., *Randomized trial of a decision aid for individuals considering genetic testing for hereditary nonpolyposis colorectal cancer risk.* Cancer, 2008. **113**(5): p. 956-65.

155. Waljee, J.F., et al., *Correlates of patient satisfaction and provider trust after breast-conserving surgery.* Cancer, 2008. **112**(8): p. 1679-1687.

156. Williams, R.M., et al., *Prostate cancer screening and shared decision-making preferences among African-American members of the Prince Hall Masons.* Psycho-Oncology, 2008. **17**(10): p. 1006-1013.

157. Allen, J.D., et al., *A computer-tailored intervention to promote informed decision making for prostate cancer screening among African American men.* American Journal of Men's Health, 2009. **3**(4): p. 340-351.

158. Becker, H., A.K. Stuifbergen, and S.L. Dormire, *The effects of hormone therapy decision support for women with mobility impairments.* Health Care for Women International, 2009. **30**(9): p. 845-854.

159. Cohan, D., et al., *Patient perspectives with abbreviated versus standard pre-test HIV counseling in the prenatal setting: a randomized-controlled, non-inferiority trial.* PLoS ONE [Electronic Resource], 2009. **4**(4): p. e5166.

160. Collins, E.D., et al., *Can women with early-stage breast cancer make an informed decision for mastectomy?* Journal of Clinical Oncology, 2009. **27**(4): p. 519-25.

161. Eden, K.B., et al., *Patients were more consistent in randomized trial at prioritizing childbirth preferences using graphic-numeric than verbal formats.* Journal of Clinical Epidemiology, 2009. **62**(4): p. 415-424.

162. Fitzpatrick, E.M., D. Angus, and B. Com, *J. Cyne Johnston, Ph. D.; Andrée Durieux Smith, Ph. D.; Annette O’Connor, Ph. D.; Karen Benzies, RN, B. Sc. N., MN, Ph. D.* Volta, 2009. **109**: p. 121–141.

163. Fransen, M.P., et al., *Ethnic differences in considerations whether or not to participate in prenatal screening for Down syndrome.* Prenatal Diagnosis, 2009. **29**(13): p. 1262-1269.

164. Gattellari, M., et al., *"Does 'peer coaching' increase GP capacity to promote informed decision making about PSA screening? A cluster randomised trial": Erratum.* Family Practice, 2009. **26**(4): p. 335.

165. Huyghe, E., et al., *Banking on fatherhood: Pilot studies of a computerized educational tool on sperm banking before cancer treatment.* Psycho-Oncology, 2009. **18**(9): p. 1011-1014.

166. Johnston, J.C., et al., *The development and piloting of a decision aid for parents considering sequential bilateral cochlear implantation for their child with hearing loss.* The Volta Review, 2009. **109**(2-3): p. 121-141.

167. Jones, L.A., et al., *Should clinicians deliver decision aids? Further exploration of the statin choice randomized trial results.* Medical Decision Making, 2009. **29**(4): p. 468-474.

168. Juraskova, I., et al., *Improving informed consent to prevention clinical trials: A randomised controlled trial of a decision aid for women invited to participate in IBIS-II.* Asia-Pacific Journal of Clinical Oncology, 2009. **5**: p. A145.

169. Knapp, C., et al., *An evaluation of two decision-making scales for children with life-limiting illnesses.* Palliative Medicine, 2009. **23**(6): p. 518-525.

170. Kuppermann, M., et al., *Computerized prenatal genetic testing decision-assisting tool: a randomized controlled trial.* Obstetrics & Gynecology, 2009. **113**(1): p. 53-63.

171. LeBlanc, A., et al., *Decisional conflict in patients and their physicians: A dyadic approach to shared decision making.* Medical Decision Making, 2009. **29**(1): p. 61-68.

172. Lyon, M.E., et al., *Who will speak for me? Improving end-of-life decision-making for adolescents with HIV and their families.* Pediatrics, 2009. **123**(2): p. e199-e206.

173. Mullan, R.J., et al., *The Diabetes Mellitus Medication Choice Decision Aid A Randomized Trial.* Archives of Internal Medicine, 2009. **169**(17): p. 1560-1568.

174. Nannenga, M.R., et al., *A treatment decision aid may increase patient trust in the diabetes specialist. The Statin Choice randomized trial.* Health Expectations: An International Journal of Public Participation in Health Care & Health Policy, 2009. **12**(1): p. 38-44.

175. Raynes-Greenow, C.H., et al., *Do audio-guided decision aids improve outcomes? A randomized controlled trial of an audio-guided decision aid compared with a booklet decision aid for Australian women considering labour analgesia.* Health Expectations: An International Journal of Public Participation in Health Care & Health Policy, 2009. **12**(4): p. 407-416.

176. Rini, C., et al., *Cognitive and emotional factors predicting decisional conflict among high-risk breast cancer survivors who receive uninformative <em>BRCA1/2</em> results.* Health Psychology, 2009. **28**(5): p. 569-578.

177. Schonberg, M.A., E.R. Marcantonio, and M.B. Hamel, *Perceptions of physician recommendations for joint replacement surgery in older patients with severe hip or knee osteoarthritis.* Journal of the American Geriatrics Society, 2009. **57**(1): p. 82-88.

178. Schwartz, M.D., et al., *Randomized trial of a decision aid for BRCA1/BRCA2 mutation carriers: Impact on measures of decision making and satisfaction.* Health Psychology, 2009. **28**(1): p. 11-19.

179. Step, M.M., L.A. Siminoff, and J.H. Rose, *Differences in Oncologist Communication Across Age Groups and Contributions to Adjuvant Decision Outcomes.* Journal of the American Geriatrics Society, 2009. **57**: p. S279-S282.

180. van den Bergh, R.C., et al., *Brief Communication: Prostate Cancer-Specific Anxiety in Dutch Patients on Active Surveillance: Validation of the Memorial Anxiety Scale for Prostate Cancer.* Quality of Life Research, 2009: p. 1061–1066.

181. van den Bergh, R.C.N., et al., *Anxiety and distress during active surveillance for early prostate cancer.* Cancer, 2009. **115**(17): p. 3868-3878.

182. van den Bergh, R.C.N., et al., *Prostate cancer-specific anxiety in Dutch patients on active surveillance: Validation of the memorial anxiety scale for prostate cancer.* Quality of Life Research: An International Journal of Quality of Life Aspects of Treatment, Care & Rehabilitation, 2009. **18**(8): p. 1061-1066.

183. Vandemheen, K.L., et al., *Randomized trial of a decision aid for patients with cystic fibrosis considering lung transplantation.* American Journal of Respiratory & Critical Care Medicine, 2009. **180**(8): p. 761-8.

184. Vodermaier, A., et al., *Contextual factors in shared decision making: a randomised controlled trial in women with a strong suspicion of breast cancer.* British Journal of Cancer, 2009. **100**(4): p. 590-7.

185. *Testing the effects of a decision aid for prostate cancer screening*. 2010, Taylor & Francis: United Kingdom. p. 307-321.

186. Allen, J.D., et al., *A randomized trial of a computer-tailored decision aid to improve prostate cancer screening decisions: results from the take the wheel trial.* Cancer Epidemiology, Biomarkers & Prevention, 2010. **19**(9): p. 2172-86.

187. Bennett, C., et al., *Validation of a Preparation for Decision Making scale.* Patient Education and Counseling, 2010. **78**(1): p. 130-133.

188. Butow, P., et al., *Shared decision making coding systems: How do they compare in the oncology context?* Patient Education and Counseling, 2010. **78**(2): p. 261-268.

189. Caleshu, C., et al., *Invasive prenatal testing decisions in pregnancy after infertility.* Prenatal Diagnosis, 2010. **30**(6): p. 575-81.

190. El-Jawahri, A., et al., *Use of Video to Facilitate End-of-Life Discussions With Patients With Cancer: A Randomized Controlled Trial.* Journal of Clinical Oncology, 2010. **28**(2): p. 305-310.

191. Evans, R., et al., *Supporting informed decision making for prostate specific antigen (PSA) testing on the web: An online randomized controlled trial.* Journal of Medical Internet Research, 2010. **12**(3): p. 81-91.

192. Fraenkel, L., et al., *Patients' Preferences for Treatment of Hepatitis C.* Medical Decision Making, 2010. **30**(1): p. 45-57.

193. Glass, N., et al., *Computerized aid improves safety decision process for survivors of intimate partner violence.* Journal of Interpersonal Violence, 2010. **25**(11): p. 1947-1964.

194. Hollinghurst, S., et al., *Economic evaluation of the DiAMOND randomized trial: cost and outcomes of 2 decision aids for mode of delivery among women with a previous cesarean section.* Medical Decision Making, 2010. **30**(4): p. 453-63.

195. Jackson, C., et al., *Evaluating a web-based MMR decision aid to support informed decision-making by UK parents: A before-and-after feasibility study.* Health Education Journal, 2010. **69**(1): p. 74-83.

196. Knapp, C., et al., *Factors affecting decisional conflict for parents with children enrolled in a paediatric palliative care programme.* International Journal of Palliative Nursing, 2010. **16**(11): p. 542-7.

197. Labrecque, M., et al., *Evaluation of the effect of a patient decision aid about vasectomy on the decision-making process: a randomized trial.* Contraception, 2010. **82**(6): p. 556-62.

198. Legare, F., et al., *Are you SURE?: Assessing patient decisional conflict with a 4-item screening test.* Canadian Family Physician, 2010. **56**(8): p. e308-14.

199. Lewis, C.L., et al., *A targeted decision aid for the elderly to decide whether to undergo colorectal cancer screening: development and results of an uncontrolled trial.* BMC Medical Informatics & Decision Making, 2010. **10**: p. 54.

200. Lo, S.S., et al., *Prospective multicenter study of the impact of the 21-gene recurrence score assay on medical oncologist and patient adjuvant breast cancer treatment selection.* Journal of Clinical Oncology, 2010. **28**(10): p. 1671-6.

201. Mann, D.M., et al., *The Statin Choice decision aid in primary care: A randomized trial.* Patient Education and Counseling, 2010. **80**(1): p. 138-140.

202. Manne, S.L., et al., *Facilitating informed decisions regarding microsatellite instability testing among high-risk individuals diagnosed with colorectal cancer.* Journal of Clinical Oncology, 2010. **28**(8): p. 1366-72.

203. McKenna, K., et al., *Parental involvement in paediatric cancer treatment decisions.* European Journal of Cancer Care, 2010. **19**(5): p. 621-630.

204. Menard, P., et al., *Evaluation of a natural health product decision aid: A tool for middle aged women considering menopausal symptom relief.* Maturitas, 2010. **65**(4): p. 366-371.

205. Perestelo-Perez, L., et al., *Decision aids for patients facing health treatment decisions in Spain: Preliminary results.* Patient Education and Counseling, 2010. **80**(3): p. 364-371.

206. Raynes-Greenow, C.H., et al., *Assisting informed decision making for labour analgesia: a randomised controlled trial of a decision aid for labour analgesia versus a pamphlet.* BMC Pregnancy & Childbirth, 2010. **10**: p. 15.

207. Rubel, S.K., et al., *Testing the effects of a decision aid for prostate cancer screening.* Journal of Health Communication, 2010. **15**(3): p. 307-321.

208. Smith, S.K., et al., *A decision aid to support informed choices about bowel cancer screening among adults with low education: Randomised controlled trial.* BMJ: British Medical Journal, 2010. **341**(7780): p. 1-13.

209. Stacey, D., L. Paquet, and R. Samant, *Exploring cancer treatment decision-making by patients: a descriptive study.* Current Oncology, 2010. **17**(4): p. 85-93.

210. Taylor, K.L., et al., *Use and evaluation of a CD-ROM-based decision aid for prostate cancer treatment decisions.* Behavioral Medicine, 2010. **36**(4): p. 130-140.

211. van den Bergh, R.C.N., et al., *Do anxiety and distress increase during active surveillance for low risk prostate cancer?* Journal of Urology, 2010. **183**(5): p. 1786-91.

212. van Til, J.A., et al., *Feasibility of web-based decision aids in neurological patients.* Journal of Telemedicine and Telecare, 2010. **16**(1): p. 48-52.

213. Volandes, A.E., et al., *Improving decision making at the end of life with video images.* Medical Decision Making, 2010. **30**(1): p. 29-34.

214. Wakefield, C.E., et al., *Time Perspective in Hereditary Cancer: Psychometric Properties of a Short Form of the Zimbardo Time Perspective Inventory in a Community and Clinical Sample.* Genetic Testing and Molecular Biomarkers, 2010. **14**(5): p. 617-627.

215. Arterburn, D.E., et al., *Randomized trial of a video-based patient decision aid for bariatric surgery.* Obesity, 2011. **19**(8): p. 1669-1675.

216. Beery, T.A., et al., *Measuring sports participation decisional conflict in youth with cardiac pacemakers and/or ICDs.* Journal of Advanced Nursing, 2011. **67**(4): p. 821-828.

217. Berman, L., et al., *Pilot testing of a decision support tool for patients with abdominal aortic aneurysms.* Journal of Vascular Surgery, 2011. **53**(2): p. 285-92.e1.

218. Biedrzycki, B.A., *Factors and outcomes of decision making for cancer clinical trial participation.* Oncology Nursing Forum, 2011. **38**(5): p. 542-552.

219. Biedrzycki, B.A. *Research Information Knowledge, Perceived Adequacy, and Understanding in Cancer Clinical Trial Participants*. in *Oncology Nursing Forum*. 2011. Onc Nurs Society.

220. Buchholz, A., et al., *Die decisional conflict scale in deutscher sprache (DCS-D)–dimensionale struktur in einer stichprobe von hausarztpatienten.* Klinische Diagnostik und Evaluation, 2011. **4**: p. 15–30.

221. Costanza, M.E., et al., *Helping men make an informed decision about prostate cancer screening: A pilot study of telephone counseling.* Patient Education and Counseling, 2011. **82**(2): p. 193-200.

222. Dahl, K., et al., *Knowledge of prenatal screening and psychological management of test decisions.* Ultrasound in Obstetrics & Gynecology, 2011. **38**(2): p. 152-7.

223. De Morgan, S., et al., *Knowledge, satisfaction with information, decisional conflict and psychological morbidity amongst women diagnosed with ductal carcinoma in situ (DCIS).* Patient Education and Counseling, 2011. **84**(1): p. 62-68.

224. Fagerlin, A., et al., *Women's interest in taking tamoxifen and raloxifene for breast cancer prevention: response to a tailored decision aid.* Breast Cancer Research & Treatment, 2011. **127**(3): p. 681-8.

225. Frost, M.H., et al., *Contralateral Prophylactic Mastectomy: Long-Term Consistency of Satisfaction and Adverse Effects and the Significance of Informed Decision-Making, Quality of Life, and Personality Traits.* Annals of Surgical Oncology, 2011. **18**(11): p. 3110-3116.

226. Hall, M.J., et al., *Effects of a decision support intervention on decisional conflict associated with microsatellite instability testing.* Cancer Epidemiology, Biomarkers & Prevention, 2011. **20**(2): p. 249-54.

227. Hanson, L.C., et al., *Improving decision‐making for feeding options in advanced dementia: A randomized, controlled trial.* Journal of the American Geriatrics Society, 2011. **59**(11): p. 2009-2016.

228. Harwood, R., C. Douglas, and D. Clark, *Decision aids for breast and nodal surgery in patients with early breast cancer: development and a pilot study.* Asia-Pacific Journal of Clinical Oncology, 2011. **7**(2): p. 114-22.

229. Hossler, C., et al., *Advance care planning for patients with ALS: Feasibility of an interactive computer program.* Amyotrophic Lateral Sclerosis, 2011. **12**(3): p. 172-177.

230. Jackson, C., et al., *Randomised cluster trial to support informed parental decision-making for the MMR vaccine.* BMC Public Health, 2011. **11**: p. 475.

231. Jibaja-Weiss, M.L., et al., *Entertainment education for breast cancer surgery decisions: A randomized trial among patients with low health literacy.* Patient Education and Counseling, 2011. **84**(1): p. 41-48.

232. Kasper, J., et al., *Patients' and observers' perceptions of involvement differ. Validation study on inter-relating measures for shared decision making.* PLoS ONE [Electronic Resource], 2011. **6**(10): p. e26255.

233. Katapodi, M.C., et al., *Psychometric testing of the decisional conflict scale: Genetic testing hereditary breast and ovarian cancer.* Nursing Research, 2011. **60**(6): p. 368-377.

234. Katapodi, M.C., et al., *Differences between women who pursued genetic testing for hereditary breast and ovarian cancer and their at-risk relatives who did not.* Oncology Nursing Forum, 2011. **38**(5): p. 572-581.

235. Légaré, F., et al., *Training family physicians in shared decision making for the use of antibiotics for acute respiratory infections: A pilot clustered randomized controlled trial.* Health Expectations: An International Journal of Public Participation in Health Care & Health Policy, 2011. **14**(Suppl 1): p. 96-110.

236. Legare, F., et al., *Prenatal screening for Down syndrome: a survey of willingness in women and family physicians to engage in shared decision-making.* Prenatal Diagnosis, 2011. **31**(4): p. 319-326.

237. Leighl, N.B., et al., *Supporting treatment decision making in advanced cancer: a randomized trial of a decision aid for patients with advanced colorectal cancer considering chemotherapy.* Journal of Clinical Oncology, 2011. **29**(15): p. 2077-84.

238. Linder, S.K., et al., *Validity of a low literacy version of the Decisional Conflict Scale.* Patient Education and Counseling, 2011. **85**(3): p. 521-524.

239. Lyerly, A.D., S. Nakagawa, and M. Kuppermann, *Decisional conflict and the disposition of frozen embryos: implications for informed consent.* Human Reproduction, 2011. **26**(3): p. 646-54.

240. McCormack, L., et al., *Translating Medical Evidence to Promote Informed Health Care Decisions.* Health Services Research, 2011. **46**(4): p. 1200-1223.

241. Montori, V.M., et al., *Use of a Decision Aid to Improve Treatment Decisions in Osteoporosis: The Osteoporosis Choice Randomized Trial.* American Journal of Medicine, 2011. **124**(6): p. 549-556.

242. Myers, R.E., et al., *Mediated decision support in prostate cancer screening: A randomized controlled trial of decision counseling.* Patient Education and Counseling, 2011. **83**(2): p. 240-246.

243. Patel, S.R. and K.L. Wisner, *Decision making for depression treatment during pregnancy and the postpartum period.* Depression and Anxiety, 2011. **28**(7): p. 589-595.

244. Peate, M., et al., *It's now or never: fertility-related knowledge, decision-making preferences, and treatment intentions in young women with breast cancer--an Australian fertility decision aid collaborative group study.* Journal of Clinical Oncology, 2011. **29**(13): p. 1670-7.

245. Powers, B.J., et al., *The effectiveness of personalized coronary heart disease and stroke risk communication.* American Heart Journal, 2011. **161**(4): p. 673-680.

246. Rini, C., et al., *Interpersonal influences on patients’ surgical decision making: The role of close others.* Journal of Behavioral Medicine, 2011. **34**(5): p. 396-407.

247. Smith, A., et al., *Sharing vs. Caring—The relative impact of sharing decisions versus managing emotions on patient outcomes.* Patient Education and Counseling, 2011. **82**(2): p. 233-239.

248. Vodermaier, A., et al., *How and for whom are decision aids effective? Long-term psychological outcome of a randomized controlled trial in women with newly diagnosed breast cancer.* Health Psychology, 2011. **30**(1): p. 12-19.

249. Yun, Y.H., et al., *Use of a decision aid to help caregivers discuss terminal disease status with a family member with cancer: a randomized controlled trial.* Journal of Clinical Oncology, 2011. **29**(36): p. 4811-9.

250. *Informed decision making about prostate cancer testing in predominantly immigrant Black men: A randomized controlled trial*. 2012, Springer: Germany. p. 320-330.

251. Baek, S.K., et al., *Effect of advanced cancer patients' awareness of disease status on treatment decisional conflicts and satisfaction during palliative chemotherapy: a Korean prospective cohort study.* Supportive Care in Cancer, 2012. **20**(6): p. 1309-16.

252. Belkora, J.K., et al., *Impact of decision aids in a sustained implementation at a breast care center.* Patient Education and Counseling, 2012. **86**(2): p. 195-204.

253. Bernhard, J., et al., *Communication about standard treatment options and clinical trials: Can we teach doctors new skills to improve patient outcomes?* Psycho-Oncology, 2012. **21**(12): p. 1265-1274.

254. Brown, R., et al., *Meeting the Decision-Making Preferences of Patients With Breast Cancer in Oncology Consultations: Impact on Decision-Related Outcomes.* Journal of Clinical Oncology, 2012. **30**(8): p. 857-862.

255. Christie, J., et al., *Cognitive and psychological impact of BRCA genetic counseling in before and after definitive surgery breast cancer patients.* Annals of Surgical Oncology, 2012. **19**(13): p. 4003-11.

256. Cox, C.E., et al., *Development and pilot testing of a decision aid for surrogates of patients with prolonged mechanical ventilation.* Critical Care Medicine, 2012. **40**(8): p. 2327-2334.

257. de Achaval, S., et al., *Impact of educational and patient decision aids on decisional conflict associated with total knee arthroplasty.* Arthritis care & research, 2012. **64**(2): p. 229-37.

258. Dear, R.F., et al., *Impact of a cancer clinical trials web site on discussions about trial participation: a cluster randomized trial.* Annals of Oncology, 2012. **23**(7): p. 1912-8.

259. Feldman-Stewart, D., et al., *The impact of explicit values clarification exercises in a patient decision aid emerges after the decision is actually made: Evidence from a randomized controlled trial.* Medical Decision Making, 2012. **32**(4): p. 616-626.

260. Fraenkel, L., et al., *Decision tool to improve the quality of care in rheumatoid arthritis.* Arthritis Care & Research, 2012. **64**(7): p. 977-985.

261. Fraenkel, L., et al., *A pilot randomized controlled trial of a decision support tool to improve the quality of communication and decision‐making in individuals with atrial fibrillation.* Journal of the American Geriatrics Society, 2012. **60**(8): p. 1434-1441.

262. Genz, J., et al., *Blood glucose testing and primary prevention of Type 2 diabetes-evaluation of the effect of evidence-based patient information: a randomized controlled trial.* Diabetic Medicine, 2012. **29**(8): p. 1011-20.

263. Giguere, A., et al., *Decision boxes for clinicians to support evidence-based practice and shared decision making: the user experience.* Implementation Science, 2012. **7**.

264. Glass, K.E., et al., *Shared decision making and other variables as correlates of satisfaction with health care decisions in a United States national survey.* Patient Education and Counseling, 2012. **88**(1): p. 100-105.

265. Goh, A.C., et al., *Perception of cancer and inconsistency in medical information are associated with decisional conflict: a pilot study of men with prostate cancer who undergo active surveillance.* BJU International, 2012. **110**(2 Pt 2): p. E50-6.

266. Hess, E.P., et al., *The Chest Pain Choice Decision Aid A Randomized Trial.* Circulation-Cardiovascular Quality and Outcomes, 2012. **5**(3): p. 251-259.

267. Hickman, R.L., Jr., B.J. Daly, and E. Lee, *Decisional conflict and regret: consequences of surrogate decision making for the chronically critically ill.* Applied Nursing Research, 2012. **25**(4): p. 271-5.

268. Hölzel, L.P., et al., *Patientenbeteiligung bei medizinischen Entscheidungen in der Integrierten Versorgung Gesundes Kinzigtal: Ergebnisse einer kontrollierten Kohortenstudie.* Bundesgesundheitsblatt - Gesundheitsforschung - Gesundheitsschutz, 2012. **55**(11-12): p. 1524-1533.

269. Kasper, J., et al., *Completing the third person's perspective on patients' involvement in medical decision-making: approaching the full picture.* Zeitschrift fur Evidenz Fortbildung und Qualitat im Gesundheitswesen, 2012. **106**(4): p. 275-83.

270. Kokufu, H., *Conflict accompanying the choice of initial treatment in breast cancer patients.* Japan Journal of Nursing Science, 2012. **9**(2): p. 177-184.

271. Lam, W.W., et al., *Psychometric assessment of the Chinese version of the decisional conflict scale in Chinese women making decision for breast cancer surgery.* Health Expectations, 2012.

272. Lee, H., et al., *Participation and conflict in the decision-making process for endoscopic resection or surgical gastrectomy for early gastric cancer.* Journal of Surgical Oncology, 2012. **106**(1): p. 101-6.

273. Légaré, F., et al., *Training family physicians in shared decision-making to reduce the overuse of antibiotics in acute respiratory infections: A cluster randomized trial.* Canadian Medical Association Journal, 2012. **184**(13): p. E726-E734.

274. Legare, F., et al., *Some but not all dyadic measures in shared decision making research have satisfactory psychometric properties.* Journal of Clinical Epidemiology, 2012. **65**(12): p. 1310-1320.

275. Lepore, S.J., et al., *Informed decision making about prostate cancer testing in predominantly immigrant Black men: A randomized controlled trial.* Annals of Behavioral Medicine, 2012. **44**(3): p. 320-330.

276. Lorenzo, A.J., et al., *Analysis of decisional conflict among parents who consent to hypospadias repair: single institution prospective study of 100 couples.* Journal of Urology, 2012. **188**(2): p. 571-5.

277. Mathers, N., et al., *Clinical effectiveness of a patient decision aid to improve decision quality and glycaemic control in people with diabetes making treatment choices: a cluster randomised controlled trial (PANDAs) in general practice.* BMJ Open, 2012. **2**(6).

278. Peate, M., et al., *Making hard choices easier: a prospective, multicentre study to assess the efficacy of a fertility-related decision aid in young women with early-stage breast cancer.* British Journal of Cancer, 2012. **106**(6): p. 1053-61.

279. Poe, J.K., J.W. Hayslip, and J.L. Studts, *Decision making and distress among individuals diagnosed with follicular lymphoma.* Journal of Psychosocial Oncology, 2012. **30**(4): p. 426-445.

280. Sawka, A.M., et al., *Randomized controlled trial of a computerized decision aid on adjuvant radioactive iodine treatment for patients with early-stage papillary thyroid cancer.* Journal of Clinical Oncology, 2012. **30**(23): p. 2906-11.

281. Schwalm, J.-D., et al., *Radial artery versus femoral artery access options in coronary angiogram procedures: randomized controlled trial of a patient-decision aid.* Circulation. Cardiovascular Quality & Outcomes, 2012. **5**(3): p. 260-6.

282. Simon, D., et al., *Effectiveness of a web-based, individually tailored decision aid for depression or acute low back pain: A randomized controlled trial.* Patient Education and Counseling, 2012. **87**(3): p. 360-368.

283. Spittler, C.A., L. Pallikathayil, and M. Bott, *Exploration of how women make treatment decisions after a breast cancer diagnosis.* Oncology Nursing Forum, 2012. **39**(5): p. E425-33.

284. Stirling, C., et al., *Decision aids for respite service choices by carers of people with dementia: development and pilot RCT.* BMC Medical Informatics & Decision Making, 2012. **12**: p. 21.

285. Sulayman, N., et al., *Psychosocial and Quality of Life in Women Receiving the 21-Gene Recurrence Score Assay: The Impact of Decision Style in Women with Intermediate RS.* Journal of Cancer Epidemiology Print, 2012. **2012**: p. 728290.

286. van Vugt, H.A., et al., *Compliance with biopsy recommendations of a prostate cancer risk calculator.* BJU International, 2012. **109**(10): p. 1480-8.

287. White, D.B., et al., *Nurse-led intervention to improve surrogate decision making.* American Journal of Critical Care, 2012. **21**(6): p. 396-409.

288. Wong, J., et al., *Development of patients' decision aid for older women with stage I breast cancer considering radiotherapy after lumpectomy.* International Journal of Radiation Oncology, Biology, Physics, 2012. **84**(1): p. 30-8.

289. Wright, J.D., et al., *Acceptance and compliance with postpartum human papillomavirus vaccination.* Obstetrics & Gynecology, 2012. **120**(4): p. 771-82.

290. Arterburn, D., et al., *A population-based, shared decision-making approach to recruit for a randomized trial of bariatric surgery versus lifestyle for type 2 diabetes.* Surgery for Obesity and Related Diseases, 2013. **9**(6): p. 837-844.

291. Banegas, M.P., et al., *Results from a randomized trial of a web-based, tailored decision aid for women at high risk for breast cancer.* Patient Education and Counseling, 2013. **91**(3): p. 364-371.

292. Battle, C.L., et al., *Perinatal antidepressant use: Understanding women’s preferences and concerns.* Journal of Psychiatric Practice, 2013. **19**(6): p. 443-453.

293. Berry, D.L., et al., *The Personal Patient Profile-Prostate decision support for men with localized prostate cancer: a multi-center randomized trial.* Urologic Oncology, 2013. **31**(7): p. 1012-21.

294. Branda, M.E., et al., *Shared decision making for patients with type 2 diabetes: a randomized trial in primary care.* Bmc Health Services Research, 2013. **13**.

295. Brinkman, W.B., et al., *Shared decision-making to improve attention-deficit hyperactivity disorder care.* Patient Education and Counseling, 2013. **93**(1): p. 95-101.

296. Brondino, N., et al., *Psychological correlates of decision-making during prenatal diagnosis: A prospective study.* Journal of Psychosomatic Obstetrics & Gynecology, 2013. **34**(2): p. 68-74.

297. Carmady, B., C.A. Smith, and B. Colagiuri, *A comparison of decision-making processes for conventional and complementary medicine in cancer patients.* Complementary Therapies in Clinical Practice, 2013. **19**(1): p. 32-5.

298. Chambers, S.K., et al., *Intervening to improve psychological outcomes for men with prostate cancer.* Psycho-Oncology, 2013. **22**(5): p. 1025-1034.

299. Davidson, J.A., et al., *A prospective clinical utility and pharmacoeconomic study of the impact of the 21-gene Recurrence Score assay in oestrogen receptor positive node negative breast cancer.* European Journal of Cancer, 2013. **49**(11): p. 2469-75.

300. Eiermann, W., et al., *The 21-gene recurrence score assay impacts adjuvant therapy recommendations for ER-positive, node-negative and node-positive early breast cancer resulting in a risk-adapted change in chemotherapy use.* Annals of Oncology, 2013. **24**(3): p. 618-24.

301. Frongillo, M., et al., *Is there shared decision making when the provider makes a recommendation?* Patient Education and Counseling, 2013. **90**(1): p. 69-73.

302. Genz, J., et al., *[Prevention of Type 2 Diabetes: Evidence-Based Patient Information - A Randomised Controlled Trial.].* Gesundheitswesen, 2013.

303. Hacking, B., et al., *Testing the feasibility, acceptability and effectiveness of a ‘decision navigation’ intervention for early stage prostate cancer patients in Scotland—A randomised controlled trial.* Psycho-Oncology, 2013. **22**(5): p. 1017-1024.

304. Henderson, C., et al., *Decision aid on disclosure of mental health status to an employer: Feasibility and outcomes of a randomised controlled trial.* The British Journal of Psychiatry, 2013. **203**(5): p. 350-357.

305. Hollen, P.J., et al., *A theory-based decision aid for patients with cancer: results of feasibility and acceptability testing of DecisionKEYS for cancer.* Supportive Care in Cancer, 2013. **21**(3): p. 889-899.

306. Holzel, L.P., L. Kriston, and M. Harter, *Patient preference for involvement, experienced involvement, decisional conflict, and satisfaction with physician: a structural equation model test.* BMC Health Services Research, 2013. **13**: p. 231.

307. Jukkala, A., et al., *Readiness to engage in treatment decision-making during initial surgical oncology consultation for early stage breast cancer.* Clinical Nursing Studies, 2013. **1**: p. p69.

308. Kawaguchi, T., et al., *Development and validation of the Japanese version of the Decisional Conflict Scale to investigate the value of pharmacists' information: a before and after study.* BMC Medical Informatics & Decision Making, 2013. **13**: p. 50.

309. Kim, J., et al., *Fertility preservation consultation for women with cancer: are we helping patients make high-quality decisions?* Reproductive Biomedicine Online, 2013. **27**(1): p. 96-103.

310. King, L., et al., *Intentions for bilateral mastectomy among newly diagnosed breast cancer patients.* Journal of Surgical Oncology, 2013. **107**(7): p. 772-6.

311. Knops, A.M., et al., *Interpreting patient decisional conflict scores: Behavior and emotions in decisions about treatment.* Medical Decision Making, 2013. **33**(1): p. 78-84.

312. Lam, W.W.T., et al., *Reducing treatment decision conflict difficulties in breast cancer surgery: a randomized controlled trial.* Journal of Clinical Oncology, 2013. **31**(23): p. 2879-85.

313. Lim, J.-w. and M.-s. Paek, *The relationship between communication and health-related quality of life in survivorship care for Chinese-American and Korean-American breast cancer survivors.* Supportive Care in Cancer, 2013. **21**(4): p. 1157-1166.

314. Lyon, M.E., et al., *Family-centered advance care planning for teens with cancer.* JAMA Pediatrics, 2013. **167**(5): p. 460-7.

315. Martinho, M.J.C.M., M.M.M.F.P. da Silva, and M. Angelo, *[Scale of conflict in health care decision-making: an instrument adapted and validated for the Portuguese language].* Revista Da Escola de Enfermagem Da Usp, 2013. **47**(3): p. 576-83.

316. Meropol, N.J., et al., *A web‐based communication aid for patients with cancer.* Cancer, 2013. **119**(7): p. 1437-1445.

317. Mersereau, J.E., et al., *To preserve or not to preserve: how difficult is the decision about fertility preservation?* Cancer, 2013. **119**(22): p. 4044-50.

318. Miller, S.M., et al., *The relationships among knowledge, self‐efficacy, preparedness, decisional conflict, and decisions to participate in a cancer clinical trial.* Psycho-Oncology, 2013. **22**(3): p. 481-489.

319. Rosenberg, S.M., et al., *Perceptions, Knowledge, and Satisfaction With Contralateral Prophylactic Mastectomy Among Young Women With Breast Cancer.* Annals of Internal Medicine, 2013. **159**(6): p. 373-+.

320. Sanderson, S.C., et al., *Informed decision-making among students analyzing their personal genomes on a whole genome sequencing course: a longitudinal cohort study.* Genome Medicine, 2013. **5**(12): p. 113.

321. Sereno, S., I. Leal, and J. Maroco, *The Role of Psychological Adjustment in the Decision-making Process for Voluntary Termination of Pregnancy.* Journal of reproduction & infertility, 2013. **14**: p. 143.

322. Seror, V., et al., *Breast Cancer Patients' Views on the Use of Genomic Testing to Guide Decisions about Their Postoperative Chemotherapy.* Public Health Genomics, 2013. **16**(3): p. 110-117.

323. Shourie, S., et al., *A cluster randomised controlled trial of a web based decision aid to support parents' decisions about their child's Measles Mumps and Rubella (MMR) vaccination.* Vaccine, 2013. **31**(50): p. 6003-10.

324. Sie, A.S., et al., *Can we test for hereditary cancer at 18 years when we start surveillance at 25? Patient reported outcomes.* Familial Cancer, 2013. **12**(4): p. 675-82.

325. Snyder, E.A., et al., *Impact of a decision aid on surrogate decision-makers' perceptions of feeding options for patients with dementia.* Journal of the American Medical Directors Association, 2013. **14**(2): p. 114-8.

326. Taylor, K.L., et al., *Decision making in prostate cancer screening using decision aids vs usual care: a randomized clinical trial.* JAMA Internal Medicine, 2013. **173**(18): p. 1704-12.

327. Tercyak, K.P., et al., *Decisional outcomes of maternal disclosure of BRCA1/2 genetic test results to children.* Cancer Epidemiology, Biomarkers & Prevention, 2013. **22**(7): p. 1260-6.

328. Thomas, K.L., et al., *Educational Videos to Reduce Racial Disparities in ICD therapy Via Innovative Designs (VIVID): A randomized clinical trial.* American Heart Journal, 2013. **166**(1): p. 157-+.

329. van Keulen, H.M., et al., *Determinants of HPV vaccination intentions among Dutch girls and their mothers: a cross-sectional study.* Bmc Public Health, 2013. **13**.

330. Vogel, R.I., et al., *Development and pilot of an advance care planning website for women with ovarian cancer: a randomized controlled trial.* Gynecologic Oncology, 2013. **131**(2): p. 430-6.

331. Westermann, G.M.A., et al., *Structured shared decision-making using dialogue and visualization: A randomized controlled trial.* Patient Education and Counseling, 2013. **90**(1): p. 74-81.

332. Williams, R.M., et al., *Fostering informed decisions: A randomized controlled trial assessing the impact of a decision aid among men registered to undergo mass screening for prostate cancer.* Patient Education and Counseling, 2013. **91**(3): p. 329-336.

333. Bastings, L., et al., *Deciding about fertility preservation after specialist counselling.* Human Reproduction, 2014. **29**(8): p. 1721-9.

334. Brohan, E., et al., *Development and preliminary evaluation of a decision aid for disclosure of mental illness to employers.* Patient Education and Counseling, 2014. **94**(2): p. 238-242.

335. Brown, I., et al., *Investigating active ingredients in a complex intervention: a nested study within the Patient and Decision Aids (PANDAs) randomised controlled trial for people with type 2 diabetes.* BMC research notes, 2014. **7**(1).

336. Butrick, M., et al., *Disparities in uptake of BRCA1/2 genetic testing in a randomized trial of telephone counseling.* Genetics in Medicine, 2014.

337. Carmody, J., et al., *Development and pilot testing of a decision aid for drivers with dementia.* BMC Medical Informatics & Decision Making, 2014. **14**: p. 19.

338. Causarano, N., et al., *Pre-consultation educational group intervention to improve shared decision-making for postmastectomy breast reconstruction: a pilot randomized controlled trial.* Supportive Care in Cancer, 2014.

339. Chabrera, C., et al., *A decision aid to support informed choices for patients recently diagnosed with prostate cancer: A randomized controlled trial.* Cancer Nursing, 2014.

340. Chien, C.-H., et al., *Changes in decisional conflict and decisional regret in patients with localised prostate cancer.* Journal of Clinical Nursing, 2014. **23**(13-14): p. 1959-69.

341. Connors, L.M., et al., *Decision making after BRCA genetic testing. Down the road of transition.* Clinical Journal of Oncology Nursing, 2014. **18**(3): p. E58-63.

342. Davis, S.N., et al., *Informed decision making among first-degree relatives of prostate cancer survivors: A pilot randomized trial.* Contemporary Clinical Trials, 2014. **39**(2): p. 327-334.

343. Eden, K.B., et al., *A Randomized Comparative Trial of Two Decision Tools for Pregnant Women with Prior Cesareans.* Journal of Obstetric, Gynecologic, & Neonatal Nursing, 2014.

344. Eley, V.A., et al., *The effect of antenatal anaesthetic consultation on maternal decision-making, anxiety level and risk perception in obese pregnant women.* International Journal of Obstetric Anesthesia, 2014. **23**(2): p. 118-24.

345. Ersek, M., et al., *Provider staffing effect on a decision aid intervention.* Clinical Nursing Research, 2014. **23**(1): p. 36-53.

346. Goldberg, H.B. and A. Shorten, *Differences between patient and provider perceptions of informed decision making about epidural analgesia use during childbirth.* Journal of Perinatal Education, 2014. **23**(2): p. 104-12.

347. Heisler, M., et al., *Comparison of Community Health Worker–Led Diabetes Medication Decision-Making Support for Low-Income Latino and African American Adults With Diabetes Using E-Health Tools Versus Print Materials: A Randomized, Controlled Trial.* Annals of internal medicine, 2014. **161**(10_Supplement): p. S13-S22.

348. Hilgeman, M.M., et al., *Preserving Identity and Planning for Advance Care (PIPAC): Preliminary outcomes from a patient-centered intervention for individuals with mild dementia.* Aging & Mental Health, 2014. **18**(4): p. 411-424.

349. Hoffman, A.S., et al., *Launching a virtual decision lab: development and field-testing of a web-based patient decision support research platform.* BMC Medical Informatics and Decision Making, 2014. **14**(1): p. 1-14.

350. Juraskova, I., et al., *Improving decision making about clinical trial participation - a randomised controlled trial of a decision aid for women considering participation in the IBIS-II breast cancer prevention trial.* British Journal of Cancer, 2014. **111**(1): p. 1-7.

351. Kaplan, A.L., et al., *Decisional conflict in economically disadvantaged men with newly diagnosed prostate cancer: Baseline results from a shared decision-making trial.* Cancer, 2014. **120**(17): p. 2721-7.

352. Kim, J. and J.E. Mersereau, *Early referral makes the decision-making about fertility preservation easier: a pilot survey study of young female cancer survivors.* Supportive Care in Cancer, 2014: p. 1-5.

353. Kinney, A.Y., et al., *Expanding Access to BRCA1/2 Genetic Counseling with Telephone Delivery: A Cluster Randomized Trial.* Journal of the National Cancer Institute, 2014. **106**(12).

354. Knapp, C., et al., *Does decisional conflict differ across race and ethnicity groups? A study of parents whose children have a life-threatening illness.* Journal of Palliative Medicine, 2014. **17**(5): p. 559-67.

355. Knops, A.M., et al., *A decision aid regarding treatment options for patients with an asymptomatic abdominal aortic aneurysm: a randomised clinical trial.* European Journal of Vascular & Endovascular Surgery, 2014. **48**(3): p. 276-83.

356. Kuraoka, Y. and K. Nakayama, *A decision aid regarding long-term tube feeding targeting substitute decision makers for cognitively impaired older persons in Japan: a small-scale before-and-after study.* BMC Geriatrics, 2014. **14**: p. 16.

357. Lam, W.W.T., et al., *Does the use of shared decision-making consultation behaviors increase treatment decision-making satisfaction among Chinese women facing decision for breast cancer surgery?* Patient Education and Counseling, 2014. **94**(2): p. 243-249.

358. Li, L.C., et al., *Proof‐of‐Concept Study of a Web‐Based Methotrexate Decision Aid for Patients With Rheumatoid Arthritis.* Arthritis care & research, 2014. **66**(10): p. 1472-1481.

359. Lorenzo, A.J., et al., *Decisional regret after distal hypospadias repair: single institution prospective analysis of factors associated with subsequent parental remorse or distress.* Journal of Urology, 2014. **191**(5 Suppl): p. 1558-63.

360. Matlock, D.D., et al., *Feasibility and acceptability of a decision aid designed for people facing advanced or terminal illness: a pilot randomized trial.* Health Expectations, 2014. **17**(1): p. 49-59.

361. Mays, D., et al., *Distress and the parenting dynamic among <em>BRCA1/2</em> tested mothers and their partners.* Health Psychology, 2014. **33**(8): p. 765-773.

362. Michalopoulos, S.N., et al., *Influence of a genomic classifier on post-operative treatment decisions in high-risk prostate cancer patients: results from the PRO-ACT study.* Current Medical Research & Opinion, 2014. **30**(8): p. 1547-56.

363. Odedina, F., et al., *Development and assessment of an evidence-based prostate cancer intervention programme for black men: the WORD on prostate cancer video.* ecancermedicalscience, 2014. **8**.

364. Orom, H., et al., *Prostate cancer survivors' beliefs about screening and treatment decision-making experiences in an era of controversy.* Psycho-Oncology, 2014.

365. Parayre, A.F., et al., *Validation of sure, a four-item clinical checklist for detecting decisional conflict in patients.* Medical Decision Making, 2014. **34**(1): p. 54-62.

366. Schauer, D.P., et al., *Predictors of bariatric surgery among an interested population.* Surgery for Obesity & Related Diseases, 2014. **10**(3): p. 547-52.

367. Schonberg, M.A., et al., *Development and evaluation of a decision aid on mammography screening for women 75 years and older.* JAMA Internal Medicine, 2014. **174**(3): p. 417-24.

368. Sheridan, S.L., et al., *The effect of a decision aid intervention on decision making about coronary heart disease risk reduction: secondary analyses of a randomized trial.* BMC Medical Informatics & Decision Making, 2014. **14**: p. 14.

369. Shirley, E., et al., *Helping Families Make Difficult Choices: Creation and Implementation of a Decision Aid for Neuromuscular Scoliosis Surgery.* J Pediatr Orthop, 2014.

370. Sie, A.S., et al., *More breast cancer patients prefer BRCA-mutation testing without prior face-to-face genetic counseling.* Familial Cancer, 2014. **13**(2): p. 143-51.

371. Simmons, R.G., et al., *Implementation of Best Practices Regarding Treatment Fidelity in the Family Colorectal Cancer Awareness and Risk Education Randomized Controlled Trial.* SAGE Open, 2014. **4**(4): p. 2158244014559021.

372. Stacey, D., et al. *Decision aid for patients considering total knee arthroplasty with preference report for surgeons: A pilot randomized controlled trial*. BMC musculoskeletal disorders, 2014. **15**, DOI: http://dx.doi.org/10.1186/1471-2474-15-54.

373. Sultan, D.H., et al., *Affecting African American Men's Prostate Cancer Screening Decision-making through a Mobile Tablet-Mediated Intervention.* Journal of Health Care for the Poor & Underserved, 2014. **25**(3): p. 1262-77.

374. Tan, J. and B. Wolfe, *Improved decisional conflict and preparedness for decision making using a patient decision aid for treatment selection in psoriasis: a pilot study.* Journal of Cutaneous Medicine & Surgery, 2014. **18**(2): p. 114-8.

375. Tong, A., et al., *Intentions for risk-reducing surgery among high-risk women referred for BRCA1/BRCA2 genetic counseling.* Psycho-Oncology, 2014.

376. Toohill, J., et al., *A randomized controlled trial of a psycho-education intervention by midwives in reducing childbirth fear in pregnant women.* Birth, 2014. **41**(4): p. 384-94.

377. Underhill, M.L., F. Hong, and D.L. Berry, *When study site contributes to outcomes in a multi-center randomized trial: a secondary analysis of decisional conflict in men with localized prostate cancer.* Health and quality of life outcomes, 2014. **12**(1).

378. Valenza, J.A., et al., *Assessing the Benefit of a Personalized EHR-Generated Informed Consent in a Dental School Setting.* Journal of Dental Education, 2014. **78**(8): p. 1182-93.

379. van Rossum, J.A., et al., *Safety, anxiety and natalizumab continuation in JC virus-seropositive MS patients.* Multiple Sclerosis, 2014. **20**(1): p. 108-11.

380. van Wijk, R.M., et al., *Parents' decision for helmet therapy in infants with skull deformation.* Childs Nervous System, 2014. **30**(7): p. 1225-32.

381. Venderbos, L.D.F., et al., *A longitudinal study on the impact of active surveillance for prostate cancer on anxiety and distress levels.* Psycho-Oncology, 2014: p. No Pagination Specified.

382. Walton, G.D., et al., *Decisional conflict among women considering antidepressant medication use in pregnancy.* Archives of Women's Mental Health, 2014: p. No Pagination Specified.

383. Watts, B.V., et al., *A Randomized Controlled Clinical Trial of a Patient Decision Aid for Posttraumatic Stress Disorder.* 2014.

384. Watts, K.J., et al., *Online prostate cancer screening decision aid for at-risk men: A randomized trial.* Health Psychology, 2014. **33**(9): p. 986-997.

385. Yamauchi, H., et al., *Prospective study of the effect of the 21-gene assay on adjuvant clinical decision-making in Japanese women with estrogen receptor-positive, node-negative, and node-positive breast cancer.* Clinical Breast Cancer, 2014. **14**(3): p. 191-7.

386. Bejarano, C., et al., *Shared Decision Making in Pediatrics: A Pilot and Feasibility Project.* Clinical Practice in Pediatric Psychology, 2015: p. No Pagination Specified.

387. Chen, J.Y., et al., *Anxiety, Decision Conflict, and Health in Caregivers of Children with ADHD: A Survey.* Journal of Pediatric Nursing, 2015.

388. Coutu, M.-F., et al., *Occupational therapists’ shared decision-making behaviors with patients having persistent pain in a work rehabilitation context: A cross-sectional study.* Patient Education and Counseling, 2015. **98**(7): p. 864-870.

389. Hersch, J., et al., *Use of a decision aid including information on overdetection to support informed choice about breast cancer screening: a randomised controlled trial.* Lancet, 2015. **385**(9978): p. 1642-52.

390. Juraskova, I., et al., *Development and piloting of a decision aid for women considering participation in the Sentinel Node Biopsy versus Axillary Clearance 2 breast cancer trial.* Clin Trials, 2015.

391. Korteland, N.M., et al., *Prosthetic aortic valve selection: current patient experience, preferences and knowledge.* Open Heart, 2015. **2**(1): p. e000237.

392. Volkmann, E.R. and J.D. FitzGerald, *Reducing gender disparities in post-total knee arthroplasty expectations through a decision aid.* BMC Musculoskeletal Disorders, 2015. **16**(1).

393. Weymann, N., et al., *Effectiveness of a Web-Based Tailored Interactive Health Communication Application for Patients With Type 2 Diabetes or Chronic Low Back Pain: Randomized Controlled Trial.* Journal of medical Internet research, 2015. **17**(3).

394. Winterbottom AE, et al., *Patient acceptability of the Yorkshire Dialysis Decision Aid (YoDDA) Booklet: a non-randomised comparison study.* Peritoneal Dialysis International, 2015.
